# Supplementary material
Source: publisher figshare collection journal article supplement (https://acs.figshare.com/ndownloader/files/4722019)
Supplement: Supplementary file 1 [file 4722019]

 
data_Compound6 

_audit_creation_method            SHELXL-97 

_publ_contact_author_name     'Dr. David A. Crich'
_publ_contact_author_address
; Department of Chemistry (m/c 111)
  University of Illinois at Chicago
  845 W. Taylor Street
  Chicago, Illinois 60607
  USA
;
_publ_contact_author_email   dcrich@uic.edu
_publ_contact_author_fax     '(312)9960431'
_publ_contact_author_phone   '(312)9965189'

#;
_publ_requested_journal      'Journal of Organic Chemistry'

# TITLE AND AUTHOR LIST
_publ_section_title
; Does Conformational Restriction Influence Stereoselectivity in the 
Formation of Arabinofuranosides?  The 3,5-Di-O-benzylidene and 
3,5-Di-O-(di-tert-butylsilylene)-2-O-benzylarabinothiofuranosides 
as Glycosyl Donors
;

loop_
_publ_author_name
_publ_author_address
'Crich, David A.'
; Department of Chemistry (m/c 111)
  University of Illinois at Chicago
  845 W. Taylor Street
  Chicago, Illinois 60607
  USA
;
'Pedersen, Christian M.'
; Department of Chemistry (m/c 111)
  University of Illinois at Chicago
  845 W. Taylor Street
  Chicago, Illinois 60607
  USA
;
'Wink, Donald J. '
; Department of Chemistry (m/c 111)
  University of Illinois at Chicago
  845 W. Taylor Street
  Chicago, Illinois 60607
  USA
;


_chemical_name_systematic 
; 
p-Cresyl 2-O-benzyl-3,5-di-O-benzylidene-1-thio-/a/-D-arabinofuranoside 

;
_chemical_formula_sum 
 'C26 H26 O4 S' 
_chemical_formula_weight          434.53 
 
loop_ 
 _atom_type_symbol 
 _atom_type_description 
 _atom_type_scat_dispersion_real 
 _atom_type_scat_dispersion_imag 
 _atom_type_scat_source 
 'C'  'C'   0.0033   0.0016 
 'International Tables Vol C Tables 4.2.6.8 and 6.1.1.4' 
 'H'  'H'   0.0000   0.0000 
 'International Tables Vol C Tables 4.2.6.8 and 6.1.1.4' 
 'O'  'O'   0.0106   0.0060 
 'International Tables Vol C Tables 4.2.6.8 and 6.1.1.4' 
 'S'  'S'   0.1246   0.1234 
 'International Tables Vol C Tables 4.2.6.8 and 6.1.1.4' 
 
_symmetry_cell_setting            monoclinic 
_symmetry_space_group_name_H-M    'P21' 
 
loop_ 
 _symmetry_equiv_pos_as_xyz 
 'x, y, z' 
 '-x, y+1/2, -z' 
 
_cell_length_a                    4.7318(5) 
_cell_length_b                    11.6928(13) 
_cell_length_c                    20.242(2) 
_cell_angle_alpha                 90.00 
_cell_angle_beta                  90.192(2) 
_cell_angle_gamma                 90.00 
_cell_volume                      1120.0(2) 
_cell_formula_units_Z             2 
_cell_measurement_temperature     296(2) 
 
_exptl_crystal_description        'needle' 
_exptl_crystal_colour             'colorless' 
_exptl_crystal_size_max       0.505    # '0.505 mm' 
_exptl_crystal_size_mid       0.154    # '0.154 mm' 
_exptl_crystal_size_min       0.141    # '0.141 mm' 
_exptl_crystal_density_diffrn     1.289 
_exptl_crystal_density_method     'not measured' 
_exptl_crystal_F_000              460 
_exptl_absorpt_coefficient_mu     0.175 
_exptl_absorpt_correction_type    'none'
 
_exptl_special_details 
; 
 ? 
; 
 
_diffrn_ambient_temperature       296(2) 
_diffrn_radiation_wavelength      0.71073 
_diffrn_radiation_type            MoK\a 
_diffrn_radiation_source          'fine-focus sealed tube' 
_diffrn_radiation_monochromator   graphite 
_diffrn_measurement_device_type   'CCD area detector' 
_diffrn_measurement_method        'phi and omega scans' 
_diffrn_reflns_number             10537 
_diffrn_reflns_av_R_equivalents   0.0467 
_diffrn_reflns_av_sigmaI/netI     0.0744 
_diffrn_reflns_limit_h_min        -6 
_diffrn_reflns_limit_h_max        6 
_diffrn_reflns_limit_k_min        -15 
_diffrn_reflns_limit_k_max        15 
_diffrn_reflns_limit_l_min        -26 
_diffrn_reflns_limit_l_max        25 
_diffrn_reflns_theta_min          1.01 
_diffrn_reflns_theta_max          28.26 
_reflns_number_total              5026 
_reflns_number_gt                 3234 
_reflns_threshold_expression      >2sigma(I) 
 
_computing_data_collection        'Bruker SMART' 
_computing_cell_refinement        'Bruker SMART' 
_computing_data_reduction         'Bruker SAINT' 
_computing_structure_solution     'SHELXS-97 (Sheldrick, 1990)' 
_computing_structure_refinement   'SHELXL-97 (Sheldrick, 1997)' 
_computing_molecular_graphics     'Bruker SHELXTL' 
_computing_publication_material   'Bruker SHELXTL' 

_refine_special_details 
; 
 Refinement of F^2^ against ALL reflections.  The weighted R-factor wR and 
 goodness of fit S are based on F^2^, conventional R-factors R are based 
 on F, with F set to zero for negative F^2^. The threshold expression of 
 F^2^ > 2sigma(F^2^) is used only for calculating R-factors(gt) etc. and is 
 not relevant to the choice of reflections for refinement.  R-factors based 
 on F^2^ are statistically about twice as large as those based on F, and R- 
 factors based on ALL data will be even larger. 
; 
 
_refine_ls_structure_factor_coef  Fsqd  
_refine_ls_matrix_type            full 
_refine_ls_weighting_scheme       calc  
_refine_ls_weighting_details 
 'calc w=1/[\s^2^(Fo^2^)+(0.0278P)^2^+0.0000P] where P=(Fo^2^+2Fc^2^)/3' 
_atom_sites_solution_primary      direct 
_atom_sites_solution_secondary    difmap 
_atom_sites_solution_hydrogens    geom 
_refine_ls_hydrogen_treatment     mixed 
_refine_ls_extinction_method      none 
_refine_ls_abs_structure_details 
 'Flack H D (1983), Acta Cryst. A39, 876-881' 
_refine_ls_abs_structure_Flack    -0.05(6) 
_refine_ls_number_reflns          5026 
_refine_ls_number_parameters      281 
_refine_ls_number_restraints      1 
_refine_ls_R_factor_all           0.0769 
_refine_ls_R_factor_gt            0.0462 
_refine_ls_wR_factor_ref          0.0823 
_refine_ls_wR_factor_gt           0.0752 
_refine_ls_goodness_of_fit_ref    0.856 
_refine_ls_restrained_S_all       0.856 
_refine_ls_shift/su_max           0.001 
_refine_ls_shift/su_mean          0.000 
 
loop_ 
 _atom_site_label 
 _atom_site_type_symbol 
 _atom_site_fract_x 
 _atom_site_fract_y 
 _atom_site_fract_z 
 _atom_site_U_iso_or_equiv 
 _atom_site_adp_type 
 _atom_site_occupancy 
 _atom_site_symmetry_multiplicity 
 _atom_site_calc_flag 
 _atom_site_refinement_flags 
 _atom_site_disorder_assembly 
 _atom_site_disorder_group 
S1 S 0.18483(13) 0.35571(6) 0.61221(3) 0.0592(2) Uani 1 1 d . . . 
O4 O -0.0609(3) 0.26026(13) 0.72004(7) 0.0512(4) Uani 1 1 d . . . 
O3 O 0.3228(3) 0.41160(12) 0.84394(7) 0.0432(4) Uani 1 1 d . . . 
O5 O 0.3327(3) 0.21777(13) 0.87420(8) 0.0528(4) Uani 1 1 d . . . 
O2 O -0.0586(3) 0.55423(13) 0.73390(8) 0.0531(4) Uani 1 1 d . . . 
C8 C 0.5169(4) 0.3573(2) 0.94788(10) 0.0440(5) Uani 1 1 d . . . 
C2 C 0.1049(5) 0.4532(2) 0.73341(11) 0.0449(6) Uani 1 1 d . . . 
H2 H 0.2985 0.4703 0.7194 0.054 Uiso 1 1 calc R . . 
C1 C -0.0331(5) 0.36714(19) 0.68528(10) 0.0437(5) Uani 1 1 d . . . 
H1 H -0.2212 0.3949 0.6727 0.052 Uiso 1 1 calc R . . 
C14 C -0.0541(5) 0.2912(2) 0.55544(12) 0.0468(6) Uani 1 1 d . . . 
C3 C 0.1086(4) 0.38517(17) 0.79678(10) 0.0397(6) Uani 1 1 d . . . 
H3 H -0.0767 0.3911 0.8180 0.048 Uiso 1 1 calc R . . 
C4 C 0.1466(5) 0.26562(18) 0.77084(11) 0.0430(6) Uani 1 1 d . . . 
H4 H 0.3351 0.2581 0.7514 0.052 Uiso 1 1 calc R . . 
C19 C -0.1529(5) 0.3522(2) 0.50317(11) 0.0551(6) Uani 1 1 d . . . 
H19 H -0.0953 0.4276 0.4976 0.066 Uiso 1 1 calc R . . 
C7 C 0.2969(5) 0.33153(19) 0.89655(11) 0.0446(6) Uani 1 1 d . . . 
H7 H 0.1091 0.3392 0.9164 0.053 Uiso 1 1 calc R . . 
C9 C 0.6159(5) 0.2738(2) 0.98958(13) 0.0612(8) Uani 1 1 d . . . 
H9 H 0.5543 0.1988 0.9842 0.073 Uiso 1 1 calc R . . 
C13 C 0.6103(5) 0.4688(2) 0.95769(12) 0.0597(8) Uani 1 1 d . . . 
H13 H 0.5429 0.5273 0.9308 0.072 Uiso 1 1 calc R . . 
C15 C -0.1406(6) 0.1789(2) 0.56276(13) 0.0614(7) Uani 1 1 d . . . 
H15 H -0.0761 0.1356 0.5983 0.074 Uiso 1 1 calc R . . 
C17 C -0.4266(5) 0.1918(2) 0.46432(12) 0.0529(7) Uani 1 1 d . . . 
C5 C 0.1186(6) 0.1837(2) 0.82770(12) 0.0570(7) Uani 1 1 d . . . 
H5A H -0.0677 0.1891 0.8473 0.068 Uiso 1 1 calc R . . 
H5B H 0.1493 0.1056 0.8132 0.068 Uiso 1 1 calc R . . 
C18 C -0.3374(6) 0.3039(2) 0.45808(13) 0.0602(7) Uani 1 1 d . . . 
H18 H -0.4030 0.3477 0.4229 0.072 Uiso 1 1 calc R . . 
C10 C 0.8052(6) 0.2993(3) 1.03934(14) 0.0706(9) Uani 1 1 d . . . 
H10 H 0.8702 0.2415 1.0671 0.085 Uiso 1 1 calc R . . 
C11 C 0.8985(6) 0.4095(3) 1.04827(13) 0.0685(8) Uani 1 1 d . . . 
H11 H 1.0256 0.4268 1.0820 0.082 Uiso 1 1 calc R . . 
C21 C 0.0544(7) 0.6365(2) 0.77808(14) 0.0856(10) Uani 1 1 d . . . 
H21A H 0.2576 0.6414 0.7725 0.103 Uiso 1 1 calc R . . 
H21B H 0.0164 0.6138 0.8233 0.103 Uiso 1 1 calc R . . 
C22 C -0.0787(6) 0.7517(2) 0.76436(15) 0.0588(7) Uani 1 1 d . . . 
C16 C -0.3233(6) 0.1315(2) 0.51703(14) 0.0621(7) Uani 1 1 d . . . 
H16 H -0.3783 0.0557 0.5223 0.075 Uiso 1 1 calc R . . 
C12 C 0.8024(6) 0.4930(2) 1.00713(14) 0.0694(9) Uani 1 1 d . . . 
H12 H 0.8671 0.5675 1.0124 0.083 Uiso 1 1 calc R . . 
C25 C -0.3002(9) 0.9647(3) 0.7408(2) 0.0969(12) Uani 1 1 d . . . 
H25 H -0.3755 1.0368 0.7327 0.116 Uiso 1 1 calc R . . 
C23 C -0.0016(8) 0.8130(3) 0.71115(17) 0.0902(10) Uani 1 1 d . . . 
H23 H 0.1283 0.7817 0.6819 0.108 Uiso 1 1 calc R . . 
C27 C -0.2712(7) 0.7980(3) 0.80635(15) 0.0719(9) Uani 1 1 d . . . 
H27 H -0.3277 0.7569 0.8434 0.086 Uiso 1 1 calc R . . 
C26 C -0.3831(7) 0.9041(3) 0.79496(19) 0.0962(11) Uani 1 1 d . . . 
H26 H -0.5148 0.9348 0.8240 0.115 Uiso 1 1 calc R . . 
C24 C -0.1074(9) 0.9193(3) 0.6986(2) 0.1047(12) Uani 1 1 d . . . 
H24 H -0.0484 0.9602 0.6618 0.126 Uiso 1 1 calc R . . 
C20 C -0.6233(6) 0.1397(3) 0.41475(13) 0.0754(9) Uani 1 1 d . . . 
H20A H -0.8138 0.1621 0.4245 0.113 Uiso 1 1 calc R . . 
H20B H -0.6082 0.0579 0.4166 0.113 Uiso 1 1 calc R . . 
H20C H -0.5741 0.1657 0.3713 0.113 Uiso 1 1 calc R . . 
 
loop_ 
 _atom_site_aniso_label 
 _atom_site_aniso_U_11 
 _atom_site_aniso_U_22 
 _atom_site_aniso_U_33 
 _atom_site_aniso_U_23 
 _atom_site_aniso_U_13 
 _atom_site_aniso_U_12 
S1 0.0508(4) 0.0783(5) 0.0485(4) -0.0111(4) 0.0023(3) -0.0110(4) 
O4 0.0589(11) 0.0453(10) 0.0494(10) -0.0012(8) -0.0088(8) -0.0104(8) 
O3 0.0462(9) 0.0406(8) 0.0429(10) 0.0021(8) -0.0078(7) -0.0016(8) 
O5 0.0619(11) 0.0412(10) 0.0551(11) 0.0029(8) -0.0131(9) 0.0043(9) 
O2 0.0667(11) 0.0388(10) 0.0536(10) -0.0042(8) -0.0203(9) 0.0044(9) 
C8 0.0414(13) 0.0528(15) 0.0377(12) 0.0034(13) 0.0008(10) 0.0071(13) 
C2 0.0419(14) 0.0461(14) 0.0466(15) -0.0029(12) -0.0043(11) 0.0008(12) 
C1 0.0421(12) 0.0416(14) 0.0473(13) -0.0031(12) -0.0089(10) -0.0012(12) 
C14 0.0469(15) 0.0546(16) 0.0389(14) -0.0099(12) 0.0046(12) -0.0010(13) 
C3 0.0359(12) 0.0428(15) 0.0403(13) -0.0001(10) -0.0012(10) 0.0012(10) 
C4 0.0439(14) 0.0386(13) 0.0467(14) -0.0040(12) -0.0029(11) 0.0006(11) 
C19 0.0674(16) 0.0485(14) 0.0493(15) 0.0006(15) 0.0004(13) -0.0022(15) 
C7 0.0448(13) 0.0434(15) 0.0454(14) 0.0042(11) 0.0022(12) 0.0059(12) 
C9 0.0570(17) 0.0670(18) 0.0594(19) 0.0150(15) -0.0089(15) -0.0074(15) 
C13 0.0641(18) 0.0546(18) 0.0603(19) -0.0077(14) -0.0194(15) 0.0150(15) 
C15 0.075(2) 0.0582(19) 0.0510(17) 0.0067(14) -0.0090(14) -0.0001(15) 
C17 0.0497(16) 0.0578(18) 0.0510(17) -0.0167(13) -0.0015(13) 0.0062(14) 
C5 0.0708(18) 0.0419(15) 0.0583(17) 0.0024(13) -0.0089(14) -0.0050(13) 
C18 0.0709(19) 0.0638(19) 0.0460(16) 0.0019(13) -0.0068(14) 0.0091(15) 
C10 0.075(2) 0.084(2) 0.0530(19) 0.0228(16) -0.0163(16) 0.0030(18) 
C11 0.0672(19) 0.089(2) 0.0488(18) -0.0108(17) -0.0179(14) 0.0139(19) 
C21 0.128(3) 0.0470(17) 0.081(2) -0.0103(16) -0.047(2) 0.0128(18) 
C22 0.076(2) 0.0394(16) 0.0612(18) -0.0082(14) -0.0246(15) 0.0007(14) 
C16 0.0728(19) 0.0461(16) 0.0673(19) -0.0058(15) -0.0047(15) -0.0069(14) 
C12 0.073(2) 0.0612(19) 0.073(2) -0.0213(16) -0.0228(17) 0.0145(16) 
C25 0.111(3) 0.0481(19) 0.131(3) -0.002(2) -0.046(3) 0.014(2) 
C23 0.114(3) 0.078(2) 0.078(2) 0.0085(19) 0.009(2) 0.018(2) 
C27 0.079(2) 0.071(2) 0.067(2) 0.0057(17) -0.0170(18) -0.0102(18) 
C26 0.090(3) 0.091(3) 0.108(3) -0.020(2) -0.012(2) 0.031(2) 
C24 0.136(3) 0.073(3) 0.105(3) 0.036(2) -0.003(3) -0.003(3) 
C20 0.068(2) 0.084(2) 0.074(2) -0.0219(17) -0.0164(16) 0.0049(17) 
 
_geom_special_details 
; 
 All esds (except the esd in the dihedral angle between two l.s. planes) 
 are estimated using the full covariance matrix.  The cell esds are taken 
 into account individually in the estimation of esds in distances, angles 
 and torsion angles; correlations between esds in cell parameters are only 
 used when they are defined by crystal symmetry.  An approximate (isotropic) 
 treatment of cell esds is used for estimating esds involving l.s. planes. 
; 
 
loop_ 
 _geom_bond_atom_site_label_1 
 _geom_bond_atom_site_label_2 
 _geom_bond_distance 
 _geom_bond_site_symmetry_2 
 _geom_bond_publ_flag 
S1 C14 1.777(2) . ? 
S1 C1 1.811(2) . ? 
O4 C4 1.421(3) . ? 
O4 C1 1.440(2) . ? 
O3 C7 1.423(2) . ? 
O3 C3 1.424(2) . ? 
O5 C7 1.415(3) . ? 
O5 C5 1.437(3) . ? 
O2 C2 1.412(3) . ? 
O2 C21 1.417(3) . ? 
C8 C9 1.372(3) . ? 
C8 C13 1.390(3) . ? 
C8 C7 1.499(3) . ? 
C2 C3 1.509(3) . ? 
C2 C1 1.544(3) . ? 
C14 C19 1.357(3) . ? 
C14 C15 1.384(3) . ? 
C3 C4 1.504(3) . ? 
C4 C5 1.504(3) . ? 
C19 C18 1.381(3) . ? 
C9 C10 1.378(4) . ? 
C13 C12 1.379(3) . ? 
C15 C16 1.380(3) . ? 
C17 C16 1.368(3) . ? 
C17 C18 1.383(3) . ? 
C17 C20 1.496(3) . ? 
C10 C11 1.374(4) . ? 
C11 C12 1.360(4) . ? 
C21 C22 1.512(4) . ? 
C22 C23 1.345(4) . ? 
C22 C27 1.361(4) . ? 
C25 C24 1.359(5) . ? 
C25 C26 1.364(5) . ? 
C23 C24 1.364(4) . ? 
C27 C26 1.368(4) . ? 
 
loop_ 
 _geom_angle_atom_site_label_1 
 _geom_angle_atom_site_label_2 
 _geom_angle_atom_site_label_3 
 _geom_angle 
 _geom_angle_site_symmetry_1 
 _geom_angle_site_symmetry_3 
 _geom_angle_publ_flag 
C14 S1 C1 101.34(10) . . ? 
C4 O4 C1 104.56(15) . . ? 
C7 O3 C3 107.22(15) . . ? 
C7 O5 C5 112.65(17) . . ? 
C2 O2 C21 111.51(18) . . ? 
C9 C8 C13 118.1(2) . . ? 
C9 C8 C7 121.2(2) . . ? 
C13 C8 C7 120.5(2) . . ? 
O2 C2 C3 116.07(18) . . ? 
O2 C2 C1 108.59(18) . . ? 
C3 C2 C1 101.32(18) . . ? 
O4 C1 C2 107.23(17) . . ? 
O4 C1 S1 112.83(15) . . ? 
C2 C1 S1 108.81(15) . . ? 
C19 C14 C15 118.7(2) . . ? 
C19 C14 S1 119.9(2) . . ? 
C15 C14 S1 121.4(2) . . ? 
O3 C3 C4 110.50(17) . . ? 
O3 C3 C2 117.49(18) . . ? 
C4 C3 C2 101.19(17) . . ? 
O4 C4 C5 117.61(19) . . ? 
O4 C4 C3 102.15(17) . . ? 
C5 C4 C3 108.29(18) . . ? 
C14 C19 C18 121.1(3) . . ? 
O5 C7 O3 111.62(17) . . ? 
O5 C7 C8 109.07(18) . . ? 
O3 C7 C8 108.96(18) . . ? 
C8 C9 C10 121.0(3) . . ? 
C12 C13 C8 120.3(2) . . ? 
C16 C15 C14 119.6(2) . . ? 
C16 C17 C18 116.8(2) . . ? 
C16 C17 C20 122.2(3) . . ? 
C18 C17 C20 120.9(3) . . ? 
O5 C5 C4 105.13(19) . . ? 
C19 C18 C17 121.3(3) . . ? 
C11 C10 C9 120.5(3) . . ? 
C12 C11 C10 119.1(3) . . ? 
O2 C21 C22 109.4(2) . . ? 
C23 C22 C27 118.2(3) . . ? 
C23 C22 C21 120.5(3) . . ? 
C27 C22 C21 121.3(3) . . ? 
C17 C16 C15 122.5(3) . . ? 
C11 C12 C13 121.0(3) . . ? 
C24 C25 C26 119.8(3) . . ? 
C22 C23 C24 122.3(3) . . ? 
C22 C27 C26 121.0(3) . . ? 
C25 C26 C27 119.6(4) . . ? 
C25 C24 C23 119.1(4) . . ? 
 
_diffrn_measured_fraction_theta_max    0.948 
_diffrn_reflns_theta_full              28.26 
_diffrn_measured_fraction_theta_full   0.948 
_refine_diff_density_max    0.424 
_refine_diff_density_min   -0.216 
_refine_diff_density_rms    0.031 
